# Supplementary material for: Amelioration of Alcohol Induced Gastric Ulcers Through the Administration of Lactobacillus plantarum APSulloc 331261 Isolated From Green Tea
Source: PubMed Central journal article supplement (PMC7090068; doi:10.3389/fmicb.2020.00420), 2020-03-17
Supplement: Image_1.pdf [file Image_1.pdf]

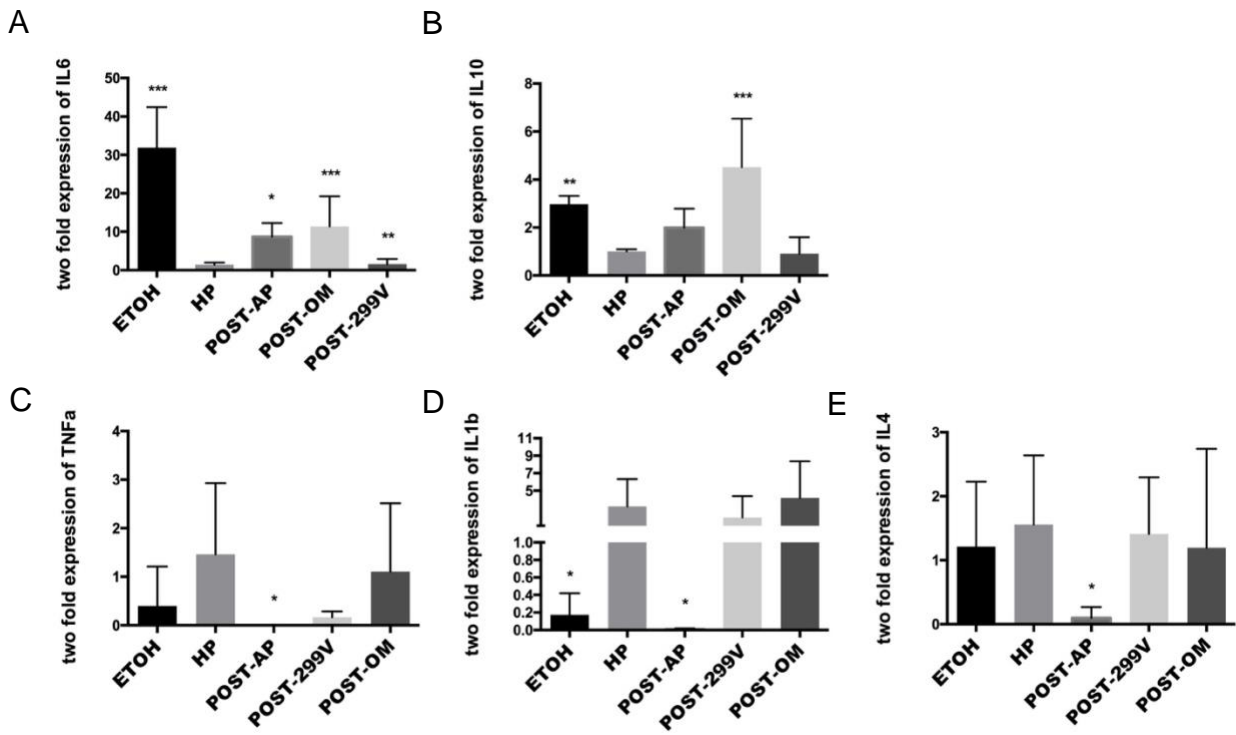

**FIGURE S1** The effect of *Lactobacillus plantarum* APSulloc 331261 GTB1<sup>TM</sup> on IL10, IL6, TNFa, IL1b, IL4 levels in gastric tissue from the *H. pylori* infected therapeutic mouse model (**A**) IL6: interleukin 6 (**B**) IL10: interleukin 10 (**C**) TNFa: tumor necrosis factor alpha (**D**) IL1b: interleukin 1 beta (**E**) IL4: interleukin 4. ETOH: ethanol treated control group, HP: *H. pylori* infected group, OM: omeprazole treated group, 299v: *Lactobacillus plantarum* 299v, AP: *Lactobacillus plantarum* APSulloc 331261 GTB1<sup>TM</sup>. Data was analyzed with one-way-ANOVA compared to EtOH; \*p<0.05, \*\*p<0.01, \*\*\*p<0.001.
