# Supplementary material for: Amelioration of Alcohol Induced Gastric Ulcers Through the Administration of Lactobacillus plantarum APSulloc 331261 Isolated From Green Tea
Source: PubMed Central journal article supplement (PMC7090068; doi:10.3389/fmicb.2020.00420), 2020-03-17
Supplement: Image_2.pdf [file Image_2.pdf]

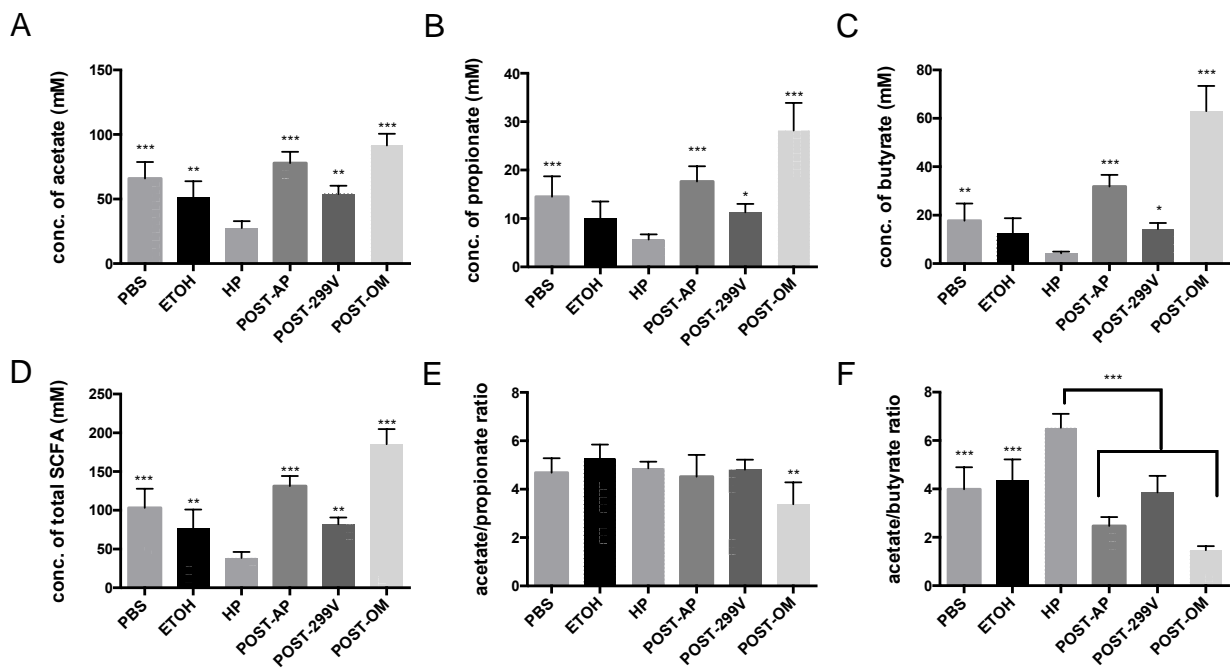

**FIGURE S2** The production of SCFAs in the cecum through the therapeutic treatment of *Lactobacillus plantarum* APSulloc 331261 GTB1™ in *H. pylori* infected mice. (A) Acetate (B) Propionate (C) Butyrate (D) Total SCFAs (E) Acetate/propionate ratio (F) Acetate/butyrate ratio. ETOH: ethanol treated control group, HP: *H. pylori* infected group, OM: omeprazole treated group, 299v: *Lactobacillus plantarum* 299v, AP: *Lactobacillus plantarum* APSulloc 331261 GTB1™. Data was analyzed with one-way-ANOVA compared to EtOH \*p<0.05, \*\*p<0.01, \*\*\*p<0.001.
